# Supplementary material
Source: PubMed Central journal article supplement (PMC1950745)
Supplement: NIHMS27879-supplement-Fig2.pdf [file NIHMS27879-supplement-Fig2.pdf]

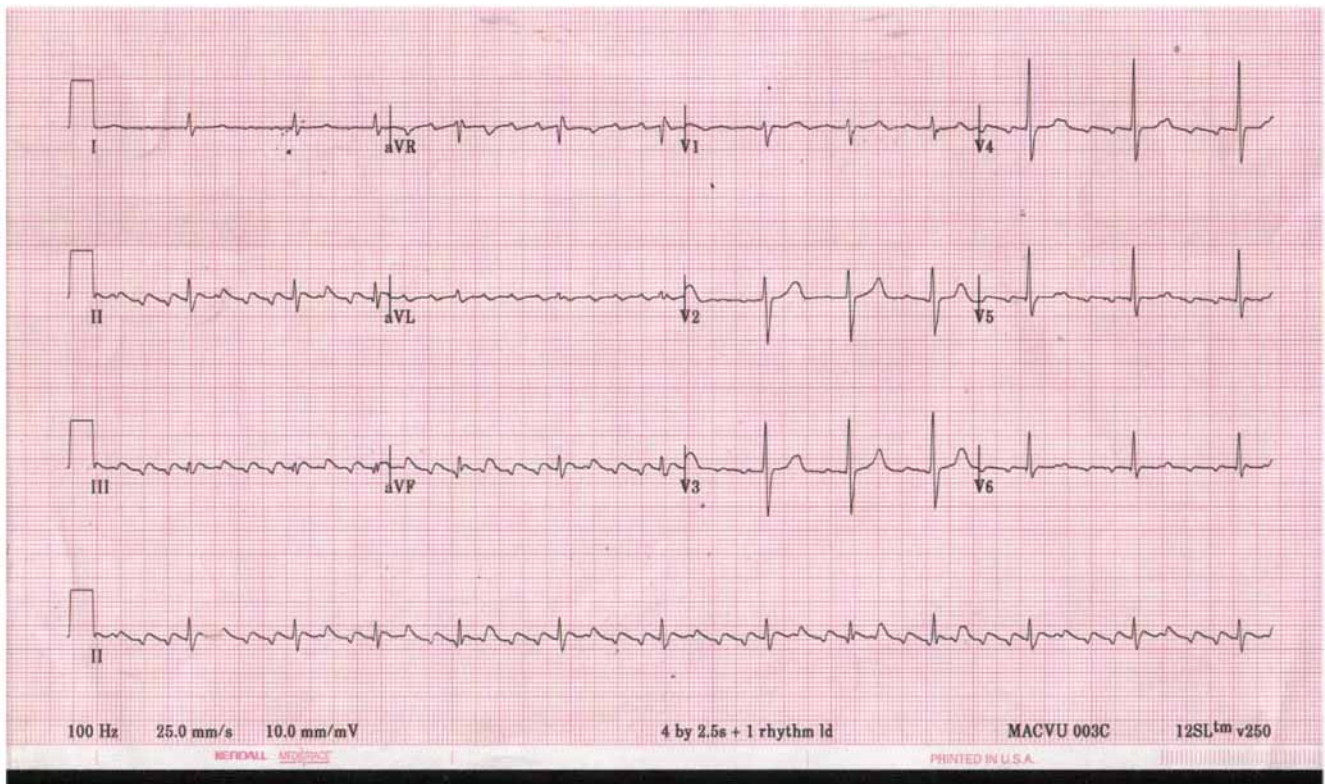

**Supplementary fig. 2 : Standard 12 lead ECG of Subject AFL who presented with chronic Atrial Flutter. Note the negative sawtooth flutter waves in leads II, III and aVF**
