# Supplementary material
Source: PubMed Central journal article supplement (PMC1950745)

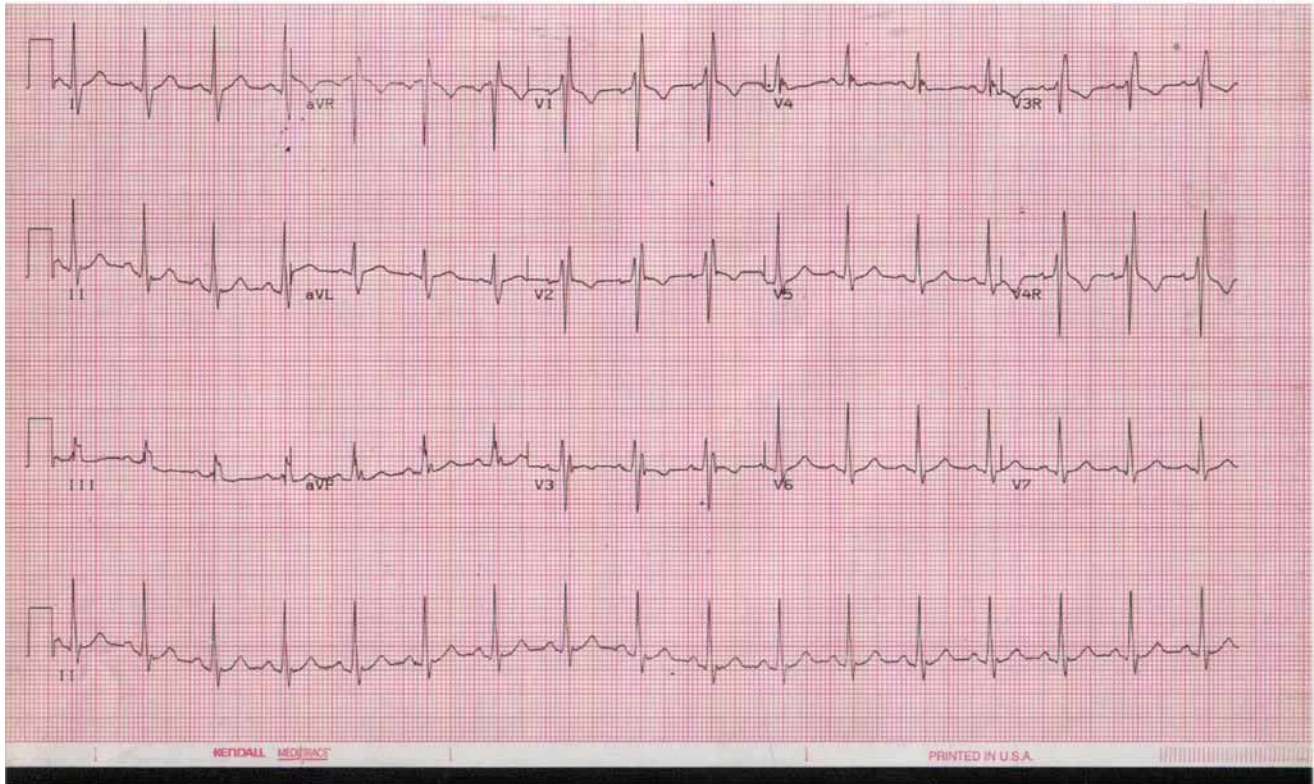

**Supplementary Fig. 1: Standard 12 lead ECG of subject R who presented with Right Bundle Branch Block**

Supplement: NIHMS27879-supplement-Fig1.pdf [file NIHMS27879-supplement-Fig1.pdf]
